# Supplementary material for: High Arctic late Paleocene and early Eocene dinoflagellate cysts
Source: Copernicus journal article supplement (doi:10.5194/jm-43-441-2024), 2024-11-08
Supplement: Supplementary file 1 [file jm-43-441-2024-supplement.zip]

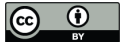

## *Supplement of*

# **High Arctic late Paleocene and early Eocene dinoflagellate cysts**

**Appy Sluijs and Henk Brinkhuis**

*Correspondence to:* Appy Sluijs (a.sluijs@uu.nl)

- jm-43-441-2024-supplement-title-page.pdf
- Supplementary Plates\_.pdf
- Table S1.pdf

The copyright of individual parts of the supplement might differ from the article licence.
