# Supplementary material for: High Arctic late Paleocene and early Eocene dinoflagellate cysts
Source: Copernicus journal article supplement (doi:10.5194/jm-43-441-2024), 2024-11-08
Supplement: Supplementary file 3 [file jm-43-441-2024-supplement.zip]

Table S1

A

| depth (mcd) | age (ka) | event name         | event recognition                       | event age                             |
|-------------|----------|--------------------|-----------------------------------------|---------------------------------------|
| 368.015     | 53952    | ?onset CIE H2?     | Sluijs et al., 2009                     | Lourens et al., 2005                  |
| 368.240     | 53992    | top CIE-ETM2       | Stein et al., 2006; Sluijs et al., 2008 | 60kyr ETM2 duration Stap et al., 2009 |
| 368.800     | 54052    | onset CIE-ETM2     | Stein et al., 2006; Sluijs et al., 2008 | Lourens et al., 2005                  |
| 369.255     | 54157    | eccentricity max 1 | Fokkema et al., in review               | Fokkema et al., in review             |
| 369.735     | 54251    | eccentricity max 2 | Fokkema et al., in review               | Fokkema et al., in review             |
| 370.235     | 54358    | eccentricity max 3 | Fokkema et al., in review               | Fokkema et al., in review             |
| 370.725     | 54443    | eccentricity max 4 | Fokkema et al., in review               | Fokkema et al., in review             |
| 381.410     | 55810    | top CIE-PETM       | Sluijs et al., 2006; updated here       | Assumes 200 kyr CIE duration          |
| 386.855     | 56010    | onset CIE-PETM     | Sluijs et al., 2006                     | Zeebe and Lourens, 2019               |
| 399.630     | 57073    | top C25n           | Backman et al., 2008                    | Westerhold et al., 2008               |

B

| interval bottom    | interval top       | sedimentation rate |
|--------------------|--------------------|--------------------|
| top CIE-ETM2       | ?onset CIE H2?     | 0.56               |
| onset CIE-ETM2     | top CIE-ETM2       | 0.93               |
| eccentricity max 1 | onset CIE-ETM2     | 0.43               |
| eccentricity max 2 | eccentricity max 1 | 0.51               |
| eccentricity max 3 | eccentricity max 2 | 0.47               |
| eccentricity max 4 | eccentricity max 3 | 0.58               |
| top CIE-PETM       | eccentricity max 4 | 0.78               |
| onset CIE-PETM     | top CIE-PETM       | 2.72               |
| top C25n           | onset CIE-PETM     | 1.20               |

**Table S1.** Age model for the upper Paleocene - lowermost Eocene sediment section in IODP Expedition 302 Hole M0004A. **A)** Age-depth tie points from magnetostratigraphy, biostratigraphy, chemostratigraphy and orbital tuning. Assignment of H2 is uncertain. Recognized eccentricity maxima are numbered downwards from the base of ETM2. (Lourens et al., 2005; Sluijs et al., 2006; Stein et al., 2006; Backman et al., 2008; Sluijs et al., 2008; Westerhold et al., 2008; Sluijs et al., 2009; Stap et al., 2010; Zeebe and Lourens, 2019; Fokkema et al., 2024; in review). **B)** Calculated average sedimentation rates between the age-depth tie points.
